# Supplementary material
Source: HighWire-hosted journal article supplement (https://bibliotheek.ehb.be/content/11/1/e001434)
Supplement: inline-supplementary-material-1 [file inline-supplementary-material-1.pdf]

## SUPPLEMENTARY MATERIALS

### **Trends in colorectal cancer surgical resection rates during the screening era: a retrospective study in Italy**

Manuel Zorzi<sup>1</sup>, Lucia Calciano<sup>1</sup>, Nicola Gennaro<sup>1</sup>, Laura Memo<sup>1</sup>, Silvia Rizzato<sup>1</sup>, Carmen Stocco<sup>1</sup>, Emanuele Damiano Urso<sup>2</sup>, Silvia Negro<sup>2</sup>, Gaya Spolverato<sup>2</sup>, Salvatore Pucciarelli<sup>2</sup>, Marta Sbaraglia<sup>3</sup>, Stefano Guzzinati<sup>1</sup>

<sup>1</sup>Epidemiological Department, Azienda Zero, Padova, Italy

<sup>2</sup>Department of Surgical, Oncological and Gastroenterological Sciences (DiSCOG), Università degli Studi di Padova, Padova, Italy

<sup>3</sup>Department of Medicine (DIMED), Pathology and Cytopathology Unit, Università degli Studi di Padova, Padova, Italy

### **Corresponding author:**

Lucia Calciano

lucia.calciano@azero.veneto.it

Table S1. Annual coverage rate\* (%) of the FIT-based screening programme (2002-2021) by local health units (LHUs). LHUs included in ITS analysis are in bold.

| LHU                    | 2002 | 2003 | 2004 | 2005 | 2006 | 2007 | 2008 | 2009 | 2010 | 2011 | 2012 | 2013 | 2014 | 2015 | 2016 | 2017 | 2018 | 2019 | 2020 | 2021 | FIT start ** |
|------------------------|------|------|------|------|------|------|------|------|------|------|------|------|------|------|------|------|------|------|------|------|--------------|
| 101-Belluno            | -    | -    | -    | 64.1 | 62.0 | 10.3 | 50.4 | 67.9 | 59.1 | 70.5 | 71.6 | 86.0 | 58.1 | 73.8 | 70.2 | 64.0 | 57.6 | 63.9 | 54.0 | 61.9 | 2005         |
| 102-Feltre             | -    | -    | 71.8 | 65.0 | 58.1 | 27.8 | 52.4 | 65.0 | 57.9 | 65.8 | 59.8 | 74.0 | 62.1 | 67.5 | 70.0 | 64.0 | 57.6 | 63.9 | 54.0 | 61.9 | 2004         |
| 103-Bassano del Grappa | -    | -    | -    | -    | -    | -    | -    | 74.8 | 72.7 | 80.9 | 91.1 | 97.0 | 59.6 | 77.3 | 78.8 | 74.5 | 71.8 | 71.1 | 52.3 | 72.7 | 2009         |
| 104-Alto Vicentino     | -    | -    | 10.1 | 66.1 | 78.2 | 38.0 | 80.8 | 94.3 | 78.4 | 80.0 | 93.1 | 90.6 | 84.7 | 77.7 | 84.6 | 74.5 | 71.8 | 71.1 | 52.3 | 72.7 | 2004         |
| 105-Ovest Vicentino    | -    | -    | -    | -    | 24.8 | 31.8 | 58.5 | 54.8 | 68.7 | 54.4 | 64.5 | 50.9 | 68.1 | 60.2 | 75.8 | 65.4 | 60.2 | 69.1 | 52.6 | 71.3 | 2006         |
| 106-Vicenza            | -    | -    | -    | -    | 29.6 | 15.0 | 14.5 | 71.1 | 49.9 | 63.8 | 69.7 | 78.6 | 59.4 | 76.2 | 62.5 | 65.4 | 60.2 | 69.1 | 52.6 | 71.3 | 2006         |
| 107-Pieve di Soligo    | 3.9  | 69.1 | 78.6 | 69.4 | 74.2 | 34.4 | 67.7 | 75.8 | 71.1 | 78.0 | 87.7 | 98.7 | 73.2 | 98.7 | 82.0 | 65.0 | 74.8 | 70.3 | 63.9 | 78.1 | 2003         |
| 108-Asolo              | -    | -    | -    | 4.1  | 0.0  | 20.2 | 65.9 | 71.9 | 76.5 | 75.4 | 62.7 | 81.0 | 72.3 | 73.3 | 75.7 | 65.0 | 74.8 | 70.3 | 63.9 | 78.1 | 2007         |
| 109-Treviso            | -    | -    | -    | -    | 16.7 | 29.0 | 49.5 | 28.9 | 55.9 | 55.3 | 70.5 | 74.2 | 67.4 | 57.0 | 74.0 | 65.0 | 74.8 | 70.3 | 63.9 | 78.1 | 2006         |
| 110-Veneto Orientale   | -    | -    | -    | -    | -    | 0.9  | 4.2  | 15.4 | 24.8 | 43.2 | 49.2 | 56.6 | 57.1 | 54.4 | 47.8 | 41.7 | 42.7 | 46.4 | 15.0 | 52.7 | 2009         |
| 112-Veneziana          | -    | -    | -    | -    | -    | -    | -    | 8.9  | 22.5 | 33.6 | 42.5 | 50.4 | 41.2 | 53.9 | 44.7 | 56.9 | 45.3 | 56.3 | 37.6 | 56.3 | 2009         |
| 113-Mirano             | 22.2 | 34.1 | 24.8 | 33.8 | 90.0 | 22.0 | 41.0 | 59.1 | 66.1 | 69.0 | 70.3 | 65.6 | 57.7 | 68.7 | 53.0 | 56.9 | 45.3 | 56.3 | 37.6 | 56.3 | 2002         |
| 114-Chioggia           | -    | -    | -    | 3.2  | 9.1  | 5.2  | 31.9 | 23.1 | 23.2 | 35.4 | 21.3 | 31.5 | 44.9 | 67.4 | 29.1 | 56.9 | 45.3 | 56.3 | 37.6 | 56.3 | 2006         |
| 115-Alta Padovana      | -    | -    | -    | 0.3  | 13.3 | 0.0  | 3.6  | 20.0 | 38.1 | 67.5 | 66.8 | 67.2 | 58.4 | 66.6 | 68.5 | 52.8 | 55.3 | 51.0 | 47.3 | 51.7 | 2006         |
| 116-Padova             | -    | -    | -    | -    | -    | -    | 40.0 | 17.1 | 53.3 | 58.2 | 62.2 | 49.5 | 52.9 | 43.9 | 55.0 | 52.8 | 55.3 | 51.0 | 47.3 | 51.7 | 2008         |
| 117-Este               | -    | -    | -    | -    | 36.1 | 6.6  | 17.7 | 32.7 | 44.1 | 34.4 | 52.3 | 55.6 | 44.0 | 71.7 | 58.8 | 52.8 | 55.3 | 51.0 | 47.3 | 51.7 | 2006         |
| 118-Rovigo             | -    | -    | -    | 5.9  | 2.6  | 14.2 | 42.6 | 56.1 | 58.4 | 82.2 | 70.5 | 57.7 | 68.8 | 56.1 | 59.7 | 55.8 | 65.0 | 55.6 | 60.0 | 56.1 | 2005         |
| 119-Adria              | -    | -    | -    | -    | -    | -    | -    | 54.9 | 66.7 | 54.4 | 79.8 | 65.6 | 67.0 | 61.3 | 70.7 | 55.8 | 65.0 | 55.6 | 60.0 | 56.1 | 2009         |
| 120-Verona             | -    | 0.5  | 1.5  | 1.1  | 10.8 | 19.3 | 57.2 | 78.4 | 45.5 | 56.5 | 42.8 | 24.4 | 48.5 | 13.4 | 37.6 | 56.3 | 60.6 | 56.2 | 19.7 | 87.1 | 2006         |
| 121-Legnago            | -    | -    | -    | 26.3 | 58.6 | 25.1 | 50.9 | 52.4 | 29.3 | 11.9 | 58.6 | 55.2 | 90.2 | 51.9 | 89.9 | 56.3 | 60.6 | 56.2 | 19.7 | 87.1 | 2005         |
| 122-Bussolengo         | -    | -    | 10.3 | 39.9 | 58.8 | 20.0 | 67.3 | 63.3 | 66.8 | 51.9 | 57.4 | 71.6 | 50.1 | 73.8 | 66.5 | 56.3 | 60.6 | 56.2 | 19.7 | 87.1 | 2004         |

\*The coverage rate was calculated as the ratio of the number of subjects who received FIT to the total number in the target population.  
\*\*FIT start indicates the year when FIT was implemented in each LHU, which was defined as the first year in which the annual coverage rate of FIT is greater than or equal to 5%.

**Figure S1. Target population (50-69 yrs): Colorectal cancer surgical resection age-adjusted rate and annual coverage rate\* (%) of the FIT-based screening programme (2002-2021) by local health units (LHUs).**

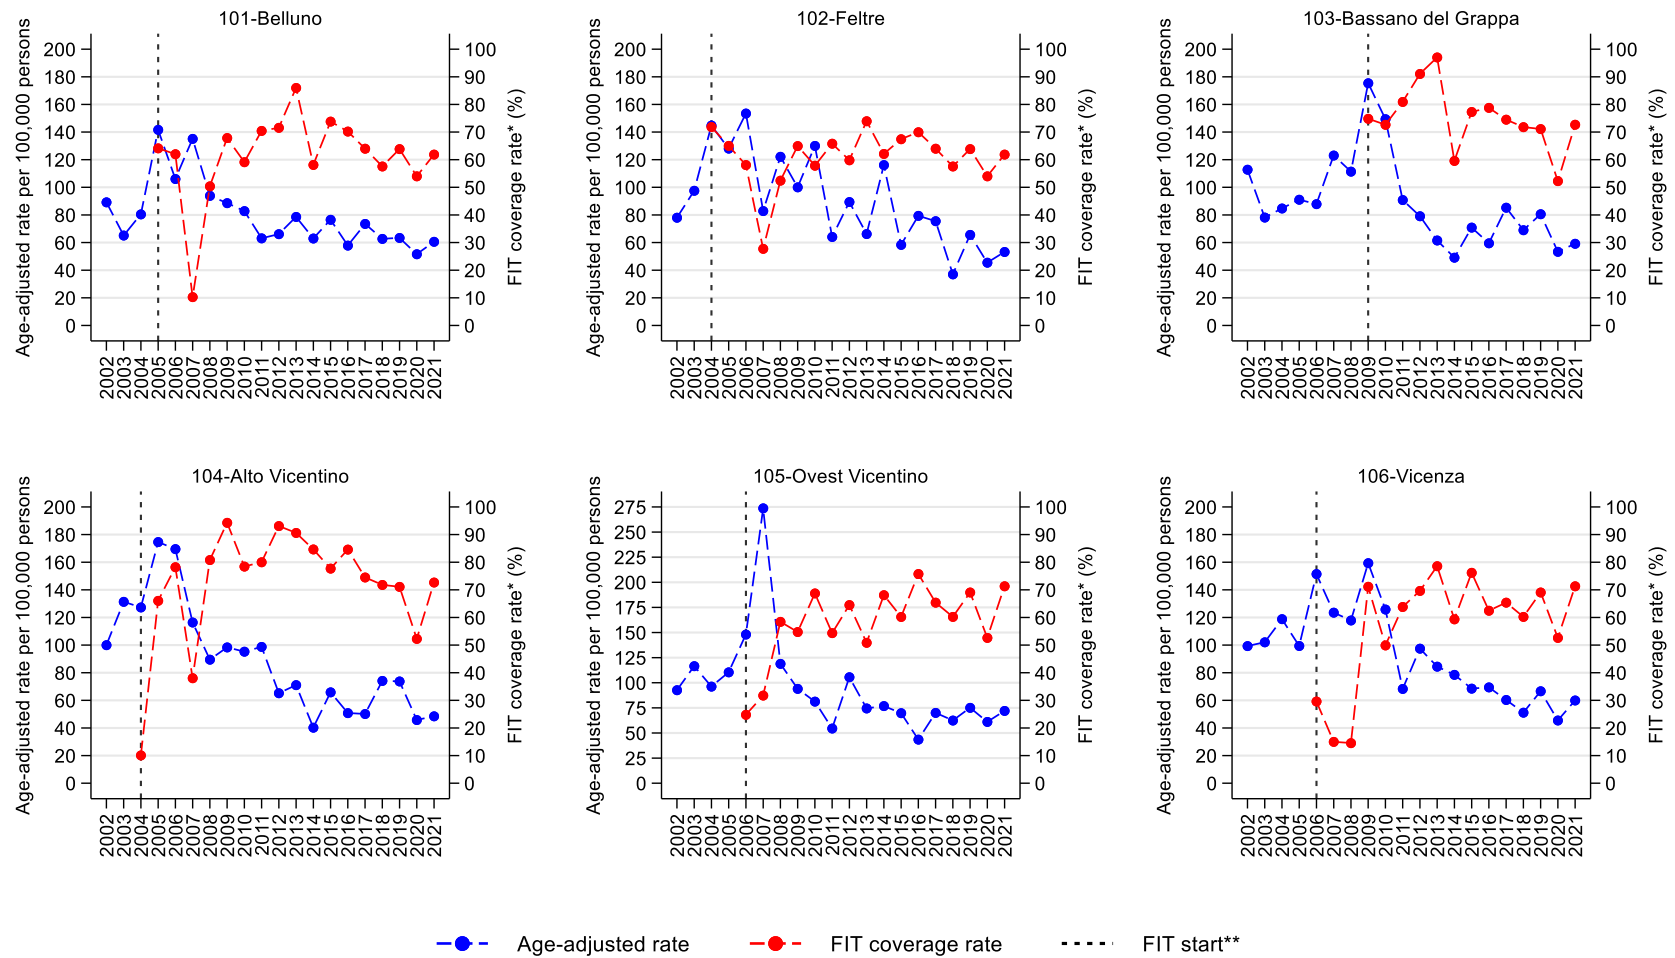

(Continued)

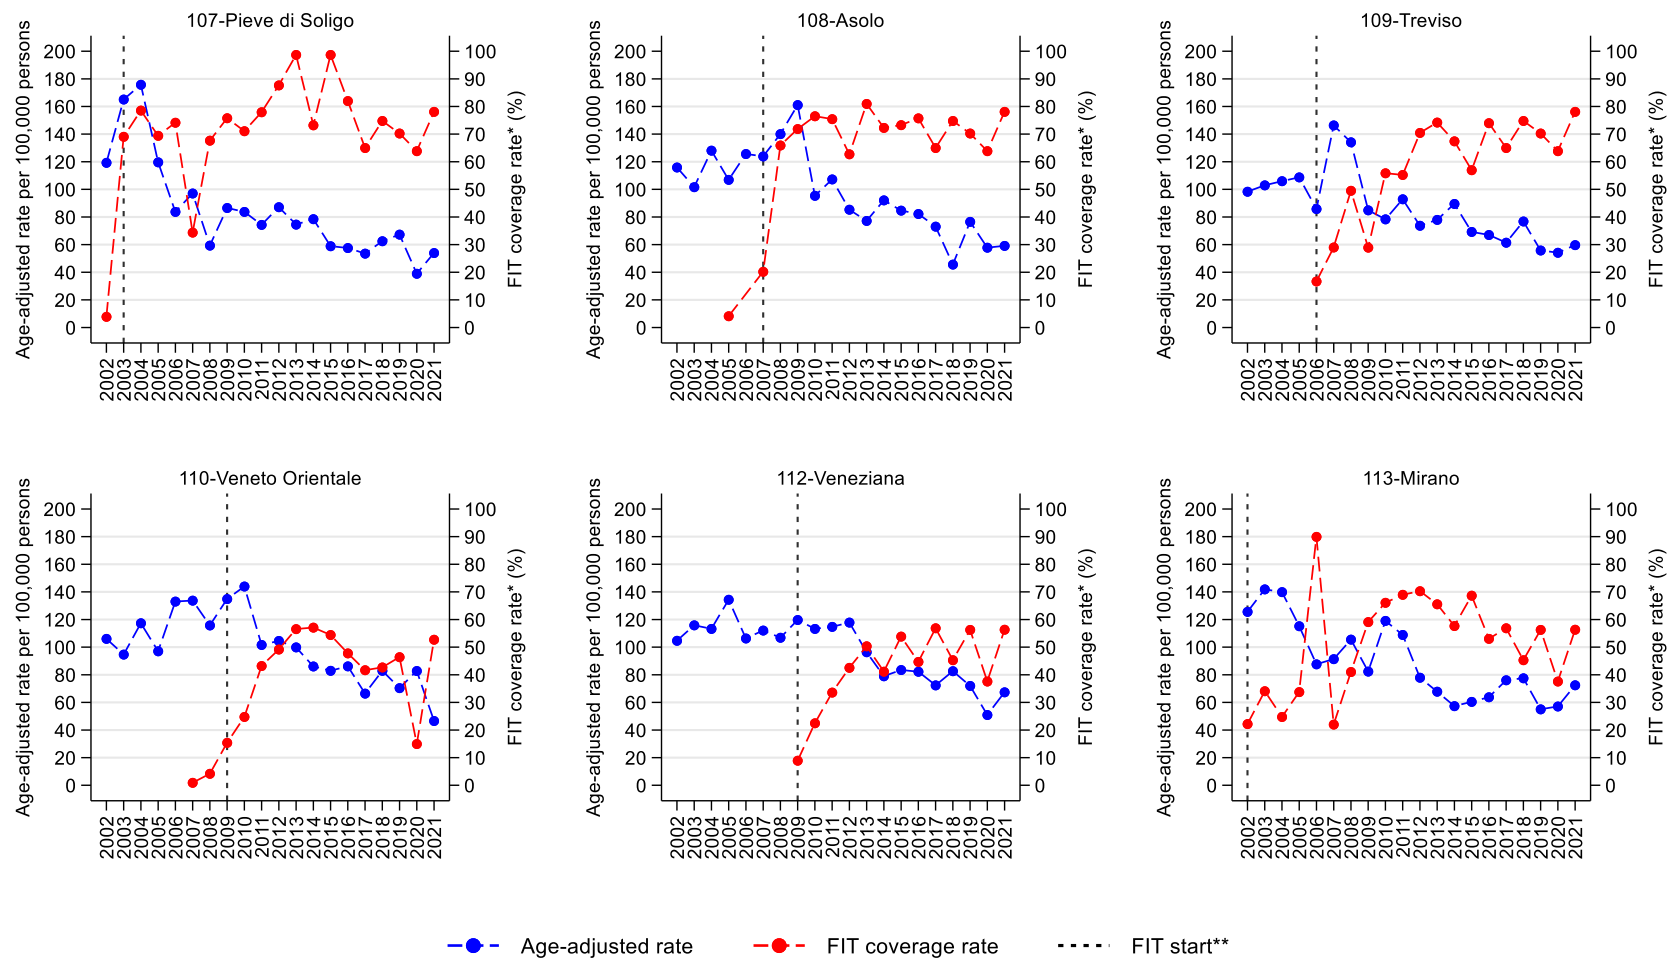

(Continued)

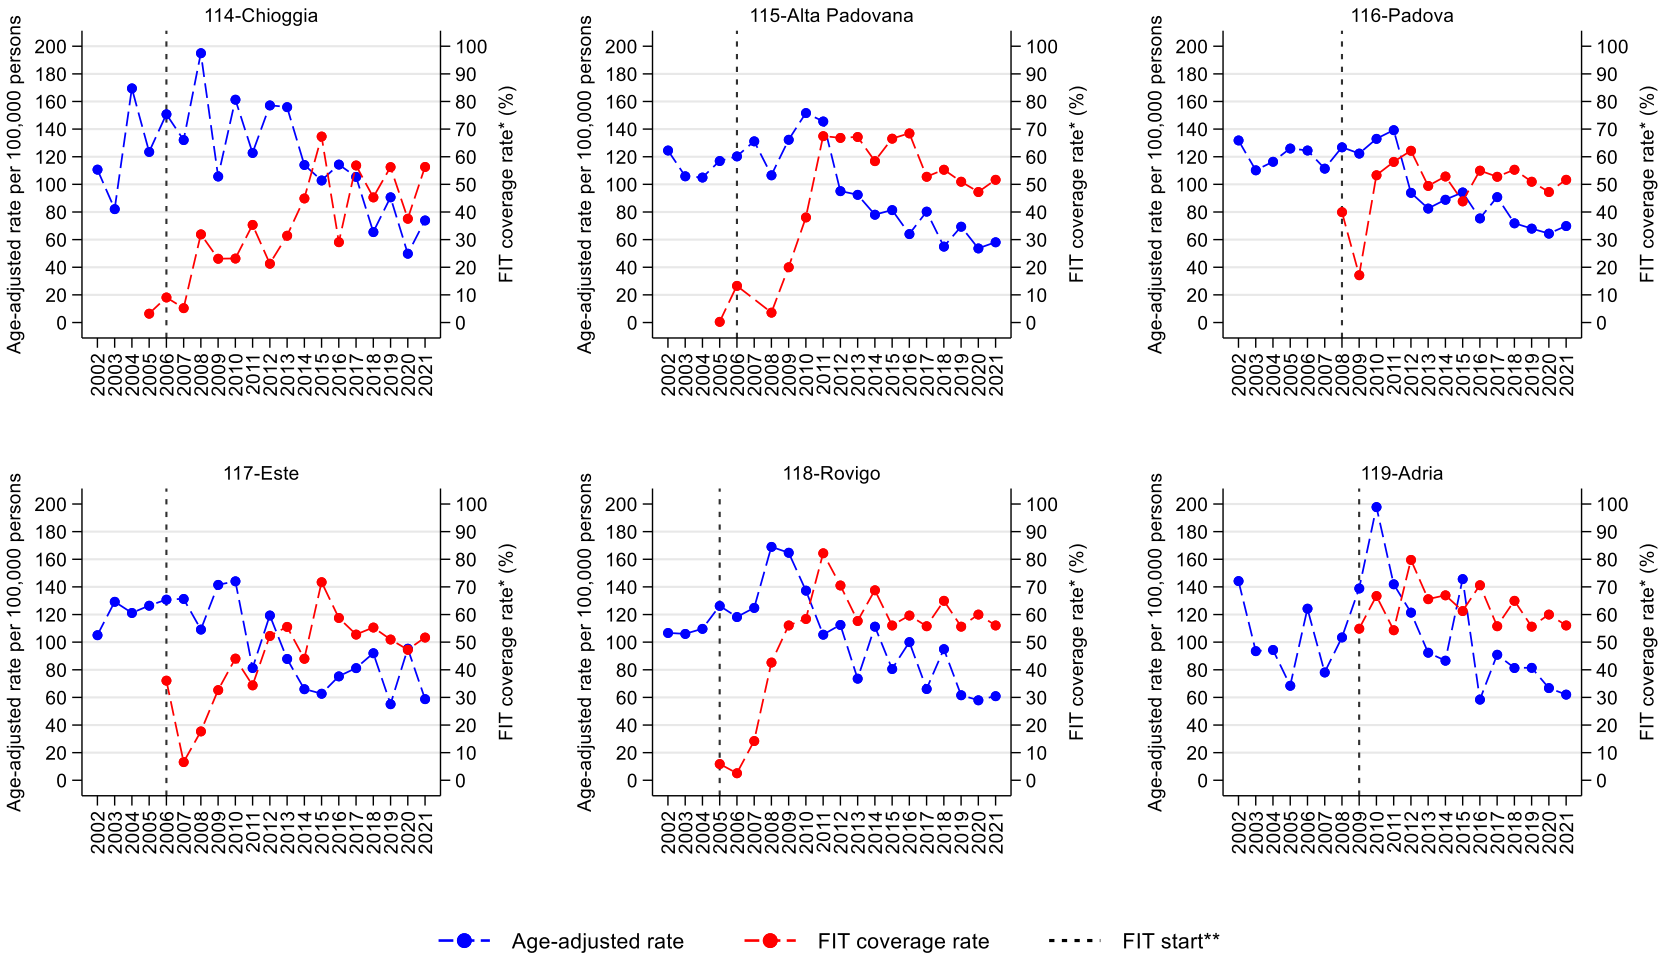

(Continued)

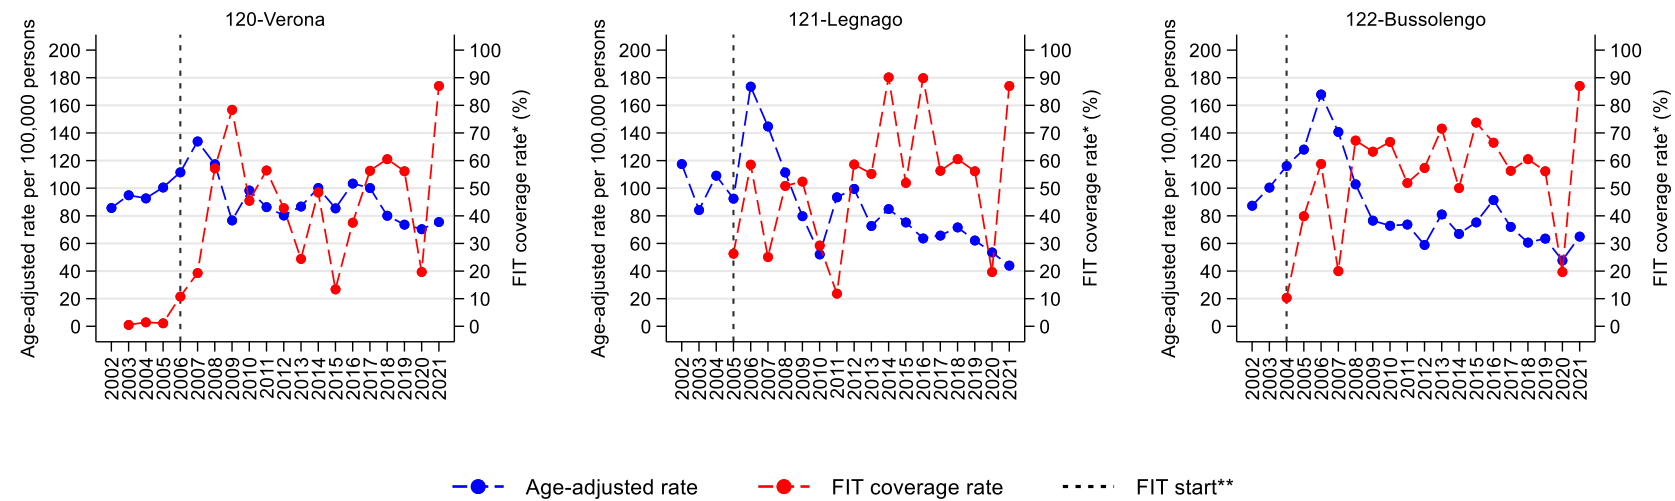

\*The coverage rate was calculated as the ratio of the number of subjects who received FIT to the total number in the target population.

\*\*FIT start indicates the year when FIT was implemented in each LHU, which was defined as the first year in which the annual coverage rate of FIT is greater than or equal to 5%.
